# Supplementary material for: A global survey of potential acceptance of a COVID-19 vaccine
Source: Springer Nature journal article supplement (doi:10.1038/s41591-020-1124-9), 2020-10-20
Supplement: 41591_2020_1124_MOESM1_ESM.pdf [file 41591_2020_1124_MOESM1_ESM.pdf]

**Supplementary information**

---

**A global survey of potential acceptance of a  
COVID-19 vaccine**

---

In the format provided by the  
authors and unedited

**Supplemental Table 1: Breakdown of demographic parameters and responses by country (n= 19)**

|                          | Brazil     | Canada     | China      | Ecuador    | France     | Germany    | India      | Italy      | Mexico     | Nigeria    | Poland     | Russia     | Singapore  | South Africa | South Korea | Spain      | Sweden     | UK         | US         |
|--------------------------|------------|------------|------------|------------|------------|------------|------------|------------|------------|------------|------------|------------|------------|--------------|-------------|------------|------------|------------|------------|
| N                        | 717        | 707        | 712        | 741        | 669        | 722        | 742        | 736        | 699        | 670        | 666        | 680        | 655        | 619          | 752         | 748        | 650        | 768        | 773        |
| Gender                   |            |            |            |            |            |            |            |            |            |            |            |            |            |              |             |            |            |            |            |
| Female                   | 436 (60.9) | 392 (55.6) | 351 (49.4) | 407 (55.0) | 333 (49.8) | 417 (58.2) | 485 (66.1) | 412 (56.0) | 364 (52.1) | 373 (55.7) | 302 (45.5) | 346 (50.9) | 310 (47.3) | 294 (47.6)   | 392 (52.3)  | 401 (53.6) | 326 (50.2) | 408 (53.3) | 423 (55.0) |
| Male                     | 276 (38.5) | 307 (43.5) | 360 (50.6) | 323 (43.6) | 334 (49.9) | 298 (41.6) | 243 (33.1) | 323 (43.9) | 332 (47.6) | 275 (41.0) | 362 (54.5) | 328 (48.2) | 342 (52.2) | 321 (51.9)   | 357 (47.7)  | 345 (46.1) | 322 (49.5) | 344 (44.9) | 337 (43.8) |
| Other                    | 4 (0.6)    | 6 (0.9)    | 0 (0.0)    | 10 (1.4)   | 2 (0.3)    | 2 (0.3)    | 6 (0.8)    | 1 (0.1)    | 2 (0.3)    | 22 (3.3)   | 0 (0.0)    | 6 (0.9)    | 3 (0.5)    | 3 (0.5)      | 0 (0.0)     | 2 (0.3)    | 2 (0.3)    | 14 (1.8)   | 9 (1.2)    |
| Income                   |            |            |            |            |            |            |            |            |            |            |            |            |            |              |             |            |            |            |            |
| <\$2 per day             | 20 (2.8)   | 22 (3.1)   | 2 (0.3)    | 30 (4.0)   | 8 (1.2)    | 2 (0.3)    | 39 (5.3)   | 4 (0.5)    | 15 (2.1)   | 195 (29.1) | 13 (2.0)   | 24 (3.5)   | 22 (3.4)   | 9 (1.5)      | 4 (0.5)     | 5 (0.7)    | 18 (2.8)   | 8 (1.0)    | 7 (0.9)    |
| \$2–\$8 per day          | 89 (12.4)  | 9 (1.3)    | 3 (0.4)    | 92 (12.4)  | 5 (0.7)    | 5 (0.7)    | 172 (23.2) | 2 (0.3)    | 88 (12.6)  | 225 (33.6) | 5 (0.8)    | 42 (6.2)   | 37 (5.6)   | 47 (7.6)     | 4 (0.5)     | 2 (0.3)    | 1 (0.2)    | 5 (0.7)    | 7 (0.9)    |
| \$8–\$32 per day         | 334 (46.6) | 56 (7.9)   | 69 (9.7)   | 344 (46.4) | 48 (7.2)   | 51 (7.1)   | 360 (48.5) | 44 (6.0)   | 306 (43.8) | 175 (26.1) | 316 (47.4) | 340 (50.0) | 236 (36.0) | 184 (29.7)   | 42 (5.6)    | 29 (3.9)   | 2 (0.3)    | 55 (7.2)   | 20 (2.6)   |
| \$32+                    | 238 (33.2) | 567 (80.2) | 633 (88.9) | 225 (30.4) | 561 (83.9) | 634 (87.8) | 163 (22.0) | 651 (88.5) | 263 (37.6) | 30 (4.5)   | 286 (42.9) | 256 (37.6) | 339 (51.8) | 329 (53.2)   | 678 (90.2)  | 692 (92.5) | 593 (91.2) | 644 (83.9) | 716 (92.6) |
| Refused                  | 36 (5.0)   | 53 (7.5)   | 5 (0.7)    | 50 (6.7)   | 47 (7.0)   | 30 (4.2)   | 8 (1.1)    | 35 (4.8)   | 27 (3.9)   | 45 (6.7)   | 46 (6.9)   | 18 (2.6)   | 21 (3.2)   | 50 (8.1)     | 24 (3.2)    | 20 (2.7)   | 36 (5.5)   | 56 (7.3)   | 23 (3.0)   |
| Education                |            |            |            |            |            |            |            |            |            |            |            |            |            |              |             |            |            |            |            |
| Less than high school    | 176 (24.6) | 204 (28.9) | 236 (33.2) | 371 (50.1) | 407 (60.8) | 338 (47.1) | 126 (17.2) | 115 (15.6) | 207 (29.7) | 249 (37.2) | 61 (9.2)   | 67 (9.9)   | 205 (31.3) | 136 (22.0)   | 183 (24.4)  | 199 (26.6) | 325 (50.0) | 167 (21.8) | 58 (7.5)   |
| High school some college | 272 (38.0) | 380 (53.9) | 436 (61.3) | 276 (37.3) | 134 (20.0) | 133 (18.5) | 429 (58.4) | 378 (51.4) | 413 (59.2) | 325 (48.5) | 295 (44.4) | 157 (23.1) | 219 (33.4) | 85 (13.8)    | 145 (19.4)  | 129 (17.2) | 146 (22.5) | 197 (25.7) | 143 (18.6) |
| Bachelor                 | 232 (32.4) | 97 (13.8)  | 33 (4.6)   | 77 (10.4)  | 105 (15.7) | 118 (16.5) | 163 (22.2) | 107 (14.5) | 66 (9.5)   | 82 (12.2)  | 308 (46.4) | 405 (59.6) | 178 (27.2) | 318 (51.5)   | 340 (45.4)  | 309 (41.3) | 114 (17.5) | 254 (33.2) | 388 (50.5) |
| Postgraduate             | 36 (5.0)   | 24 (3.4)   | 6 (0.8)    | 16 (2.2)   | 23 (3.4)   | 128 (17.9) | 16 (2.2)   | 136 (18.5) | 12 (1.7)   | 14 (2.1)   | 0 (0.0)    | 51 (7.5)   | 53 (8.1)   | 79 (12.8)    | 81 (10.8)   | 111 (14.8) | 65 (10.0)  | 148 (19.3) | 180 (23.4) |
| Age                      |            |            |            |            |            |            |            |            |            |            |            |            |            |              |             |            |            |            |            |
| 18–24                    | 171 (23.9) | 102 (14.5) | 85 (12.0)  | 224 (30.3) | 105 (15.7) | 84 (11.7)  | 58 (7.9)   | 111 (15.1) | 134 (19.2) | 203 (30.3) | 84 (12.7)  | 76 (11.2)  | 118 (18.0) | 77 (12.5)    | 83 (11.1)   | 115 (15.4) | 63 (9.7)   | 121 (15.8) | 43 (5.6)   |
| 25–54                    | 412 (57.5) | 428 (60.7) | 450 (63.3) | 425 (57.4) | 381 (57.0) | 403 (56.2) | 599 (81.6) | 457 (62.1) | 416 (59.6) | 439 (65.5) | 382 (57.5) | 441 (64.9) | 399 (60.9) | 400 (64.7)   | 499 (66.6)  | 486 (65.0) | 297 (45.7) | 479 (62.5) | 567 (73.7) |
| 55–64                    | 57 (8.0)   | 86 (12.2)  | 62 (8.7)   | 58 (7.8)   | 77 (11.5)  | 117 (16.3) | 48 (6.5)   | 94 (12.8)  | 69 (9.9)   | 28 (4.2)   | 95 (14.3)  | 86 (12.6)  | 84 (12.8)  | 70 (11.3)    | 97 (13.0)   | 70 (9.4)   | 128 (19.7) | 79 (10.3)  | 88 (11.4)  |
| 65+                      | 76 (10.6)  | 89 (12.6)  | 114 (16.0) | 33 (4.5)   | 106 (15.8) | 113 (15.8) | 29 (4.0)   | 74 (10.1)  | 79 (11.3)  | 0 (0.0)    | 103 (15.5) | 77 (11.3)  | 54 (8.2)   | 71 (11.5)    | 70 (9.3)    | 77 (10.3)  | 162 (24.9) | 87 (11.4)  | 71 (9.2)   |

| Vaccine question general  |            |            |            |            |            |            |            |            |            |            |            |            |            |            |            |            |            |            |            |
|---------------------------|------------|------------|------------|------------|------------|------------|------------|------------|------------|------------|------------|------------|------------|------------|------------|------------|------------|------------|------------|
| Completely agree          | 481 (67.1) | 341 (48.2) | 413 (58.0) | 383 (51.7) | 202 (30.2) | 327 (45.3) | 329 (44.3) | 323 (43.9) | 395 (56.5) | 310 (46.3) | 241 (36.2) | 181 (26.6) | 319 (48.7) | 316(51.1)  | 327 (43.5) | 400 (53.5) | 296 (45.5) | 361 (47.0) | 341 (44.1) |
| Somewhat agree            | 131 (18.3) | 145 (20.5) | 218 (30.6) | 150 (20.2) | 192 (28.7) | 167 (23.1) | 224 (30.2) | 198 (26.9) | 138 (19.7) | 127 (19.0) | 134 (20.1) | 192 (28.2) | 126 (19.2) | 189 (30.5) | 273 (36.3) | 156 (20.9) | 128 (19.7) | 188 (24.5) | 242 (31.3) |
| Neutral/no opinion        | 57 ( 7.9)  | 106 (15.0) | 76 (10.7)  | 94 (12.7)  | 152 (22.7) | 111 (15.4) | 105 (14.2) | 109 (14.8) | 83 (11.9)  | 94 (14.0)  | 109 (16.4) | 128 (18.8) | 73 (11.1)  | 84 (13.6)  | 114 (15.2) | 92 (12.3)  | 117 (18.0) | 105 (13.7) | 103 (13.3) |
| Somewhat disagree         | 29 ( 4.0)  | 55 ( 7.8)  | 5 ( 0.7)   | 40 ( 5.4)  | 49 ( 7.3)  | 43 ( 6.0)  | 42 ( 5.7)  | 51 ( 6.9)  | 29 ( 4.1)  | 53 ( 7.9)  | 64 ( 9.6)  | 75 (11.0)  | 40 ( 6.1)  | 21 (3.4)   | 27 (3.6)   | 53 ( 7.1)  | 56 ( 8.6)  | 54 ( 7.0)  | 33 ( 4.3)  |
| Completely disagree       | 19 ( 2.6)  | 60 ( 8.5)  | 0 ( 0.0)   | 74 (10.0)  | 74 (11.1)  | 74 (10.2)  | 42 ( 5.7)  | 55 ( 7.5)  | 54 ( 7.7)  | 86 (12.8)  | 118 (17.7) | 104 (15.3) | 97 (14.8)  | 9 ( 1.5)   | 11 (1.5)   | 47 ( 6.3)  | 53 ( 8.2)  | 60 ( 7.8)  | 54 ( 7.0)  |
| Vaccine question employer |            |            |            |            |            |            |            |            |            |            |            |            |            |            |            |            |            |            |            |
| Completely agree          | 68 ( 9.5)  | 78 (11.0)  | 306 (43.0) | 48 ( 6.5)  | 49 ( 7.3)  | 118 (16.3) | 184 (24.8) | 55 ( 7.5)  | 78 (11.2)  | 96 (14.3)  | 78 (11.7)  | 37 ( 5.4)  | 97 (14.8)  | 74 (12.0)  | 174 (23.1) | 75 (10.0)  | 65 (10.0)  | 92 (12.0)  | 109 (14.1) |
| Somewhat agree            | 190 (26.5) | 280 (39.6) | 290 (40.7) | 153 (20.6) | 239 (35.7) | 271 (37.5) | 290 (39.1) | 300 (40.8) | 233 (33.3) | 200 (29.9) | 215 (32.3) | 147 (21.6) | 245 (37.4) | 208 (33.6) | 362 (48.1) | 234 (31.3) | 162 (24.9) | 271 (35.3) | 289 (37.4) |
| Neutral/no opinion        | 158 (22.0) | 227 (32.1) | 90 (12.6)  | 192 (25.9) | 197 (29.4) | 209 (28.9) | 125 (16.8) | 220 (29.9) | 157 (22.5) | 158 (23.6) | 161 (24.2) | 218 (32.1) | 153 (23.4) | 211 (34.1) | 161 (21.4) | 178 (23.8) | 257 (39.5) | 234 (30.5) | 182 (23.5) |
| Somewhat disagree         | 206 (28.7) | 89 (12.6)  | 23 ( 3.2)  | 193 (26.0) | 135 (20.2) | 92 (12.7)  | 84 (11.3)  | 115 (15.6) | 146 (20.9) | 130 (19.4) | 134 (20.1) | 184 (27.1) | 120 (18.3) | 90 (14.5)  | 35 (4.7)   | 173 (23.1) | 121 (18.6) | 104 (13.5) | 125 (16.2) |
| Completely disagree       | 95 (13.2)  | 33 ( 4.7)  | 3 ( 0.4)   | 155 (20.9) | 49 ( 7.3)  | 32 ( 4.4)  | 59 ( 8.0)  | 46 ( 6.2)  | 85 (12.2)  | 86 (12.8)  | 78 (11.7)  | 94 (13.8)  | 40 ( 6.1)  | 36 ( 5.8)  | 20 (2.7)   | 88 (11.8)  | 45 ( 6.9)  | 67 ( 8.7)  | 68 ( 8.8)  |
